# Supplementary material for: Unveiling the status of alien animals in the arid zone of Asia
Source: PeerJ. 2016 Jan 12;4:e1545. doi: 10.7717/peerj.1545 (PMC4715455; doi:10.7717/peerj.1545)
Supplement: Supplemental Information 4 [file peerj-04-1545-s004.xlsx]

## Sheet: Variables for GLMMs
	Response	Explanatory
		Geographic			Climate			Human
PREFECTURE	SP	AREA	WL	SW	TEMP	PP	TRANGE	LU	TD	FT	GDP
Aksu	43	127145	1018.86	65.87	10.6	80.8	34.8	55517	3.9	0.180348	6121381
Kizilsu	7	72468.1	326.89	74.59	12.3	167.5	35	32637	4.2	3.4118	610309
Altay	31	117699	1353.84	89.14	4.1	253.4	42.1	107415	4.3	0.0936232	1881090
Bortala	30	24934.3	1331.27	27.95	6.5	166.3	44	19483	7.2	37.3062	1854011
Bayingolin	58	470954	4034.7	122.7	12.1	127.4	36.1	98223	2.5	0.228959	9075401
Changji	35	73139.8	264.46	29.55	7.8	175.6	44.7	61465	3.9	0.887816	8185631
Hami	21	142095	179	9.14	10	61.9	39.3	46163	9.7	0.2183	2682518
Hotan	24	249147	1788.87	103.5	13.2	77.8	33.1	41275	2.1	0.0164781	1472873
Kashi	35	137579	1056.83	68.38	11.9	120.5	34.3	32107	3.1	0.112951	5173492
Tacheng	36	94698.2	352.75	47.72	7.6	256.3	36.8	77520	2.8	0.703158	4862311
Turpan	18	67562.9	127.84	5.27	15.5	21.6	41.7	8732	6.6	0.303496	2433907
Urumqi	47	14875.5	74.72	9.56	7.4	286.9	39.6	9516	12.5	7.25266	20017386
Ili	73	56381.5	543.92	187.5	9.2	235	35.3	48538	4.1	21.0229	5776226
Karamay	23	8654.08	214.69	0.05	8.1	169.2	44.4	4249	1.8	0.748425	8107054
SP	Number of alien species per prefecture
WL(km2)	total area of wetlands per prefecture
SW(10 milion tons)	annual volume of suface water
PP(mm)	Precipitation per annual
TRANGE(℃)	The difference of average temperature between Jan and Jul
LU(km2)	Area of used land, including for farming and construction
TD	Percentage of transportation output in GDP
FT	Percentage of import value in GDP
GDP(10000 RMB)	Gross domestic product per prefecture

## Sheet: Distribution pattern
PREFECTURE	Number of alien species	Volume of surface water (10 million tons)	GDP (billion RMB)
Aksu	43	65.87	61.2138
Kizilsu	7	74.59	6.10309
Altay	31	89.14	18.8109
Bortala	30	27.95	18.5401
Bayingolin	58	122.7	90.754
Changji	35	29.55	81.8563
Hami	21	9.14	26.8252
Hotan	24	103.5	14.7287
Kashi	35	68.38	51.7349
Tacheng	36	47.72	48.6231
Turpan	18	5.27	24.3391
Urumqi	47	9.56	200
Ili	73	187.5	57.7623
Karamay	23	0.05	81.0705

## Sheet: Annual rate of aliens
	Mammalia	Aves	Amphibia	Actinopterygii	Insecta	Arachnida
1951-1980	0.133333	0	0.0333333	0.433333	0.333333	0
1981-1990	0	0.1	0	0.6	0.5	0.1
1991-2000	0.2	0	0	1.1	1.4	0.3
After 2001	0.153846	0.384615	0	0.230769	1.30769	0.0769231
	Invasive	Established	Non-established	Present but no details
1951-1980	0.566667	0.3	0.0333333	0.0333333
1981-1990	0.7	0.1	0.4	0.1
1991-2000	1.4	1.4	0.1	0.1
After 2001	0.538462	0.923077	0.307692	0.384615

## Sheet: Temporal trends
Temporal period	GDP (1000 million RMB)	Import volume (%)	Transportation ouput (%)	Number of new alien species(spp.)
1981-1985	8.1038	1.64447	4.04502	5
1986-1990	18.9798	1.93359	5.56802	8
1991-1995	54.2128	4.62965	6.9194	12
1996-2000	111.489	6.17964	9.76848	18
2001-2005	196.077	8.59342	8.28962	15
2006-2010	409.323	4.95571	4.72141	13
